# Supplementary material for: Dynamic Changes in the Global Transcriptome of Postnatal Skeletal Muscle in Different Sheep
Source: MDPI journal article supplement (doi:10.3390/genes14061298), 2023-06-20
Supplement: s1 [file s1]

Figure. S3

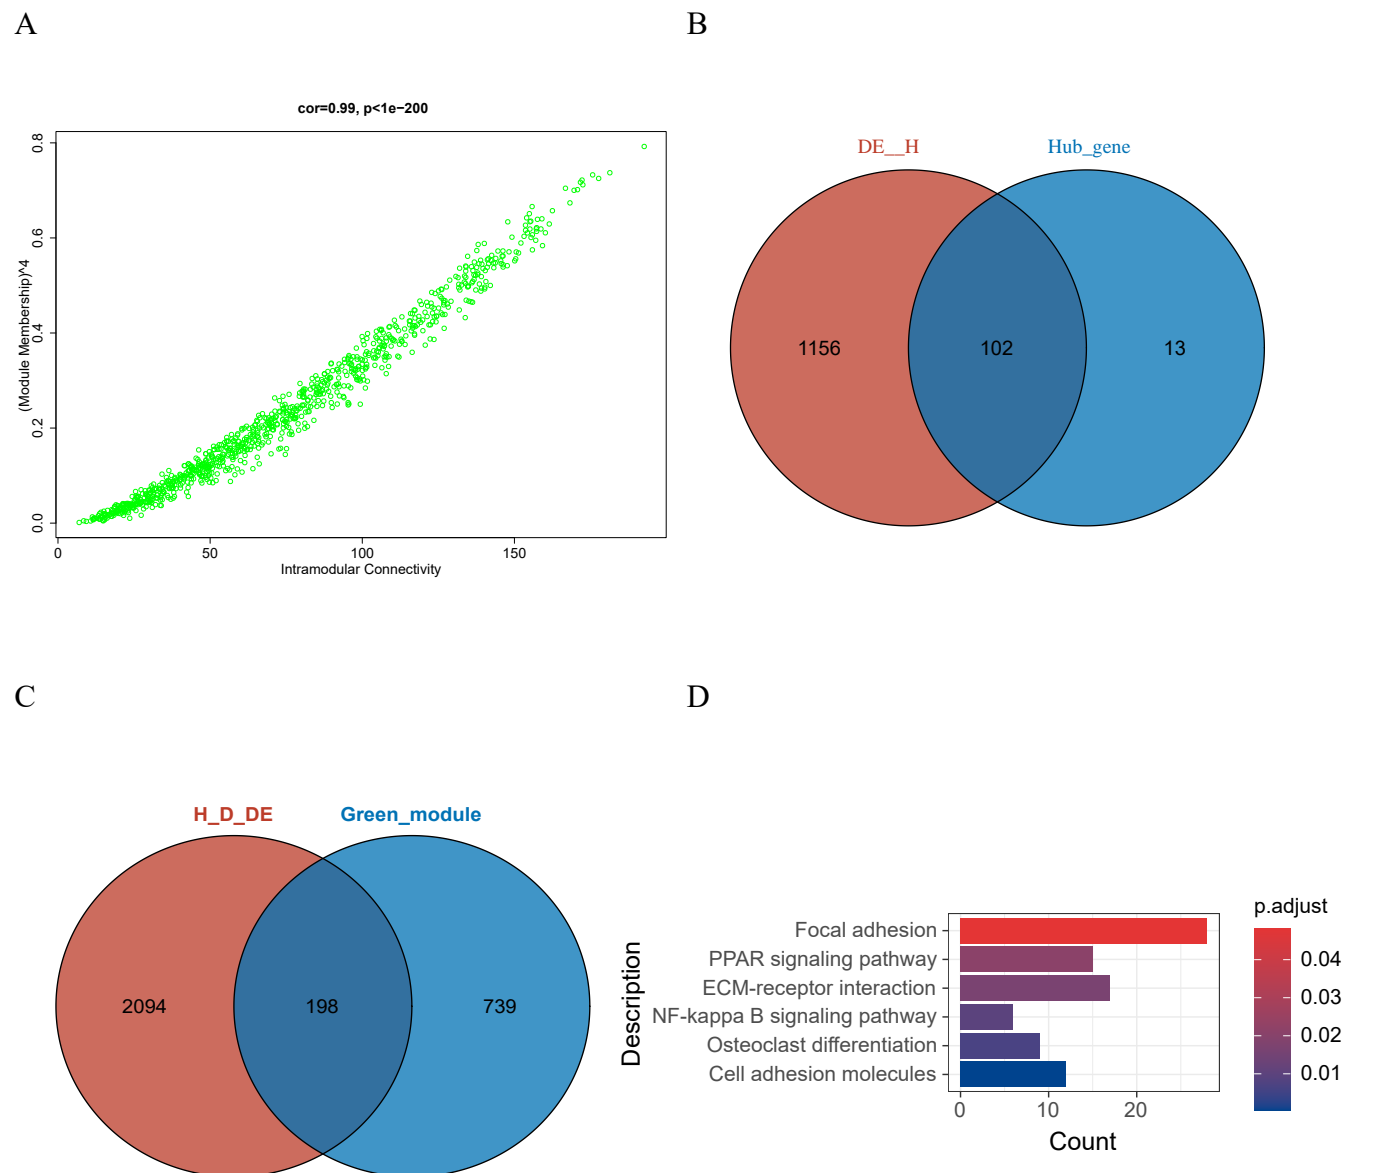

**Figure S3.**(A) Intramodular connectivity measures connectivity or co-expression of given genes in the MEgreen modules. (B) The DEGs of H and MEgreenmodule hub gene in Figure3B intersection gene.(C) The DEGs between H and D from 3M to 12M and the MEgreen module in Figure3B intersection gene. (D) KEGG pathways for Figure3E genes.
