# Supplementary material for: Dynamic Changes in the Global Transcriptome of Postnatal Skeletal Muscle in Different Sheep
Source: MDPI journal article supplement (doi:10.3390/genes14061298), 2023-06-20
Supplement: s1 [file s1]

Figure. S2

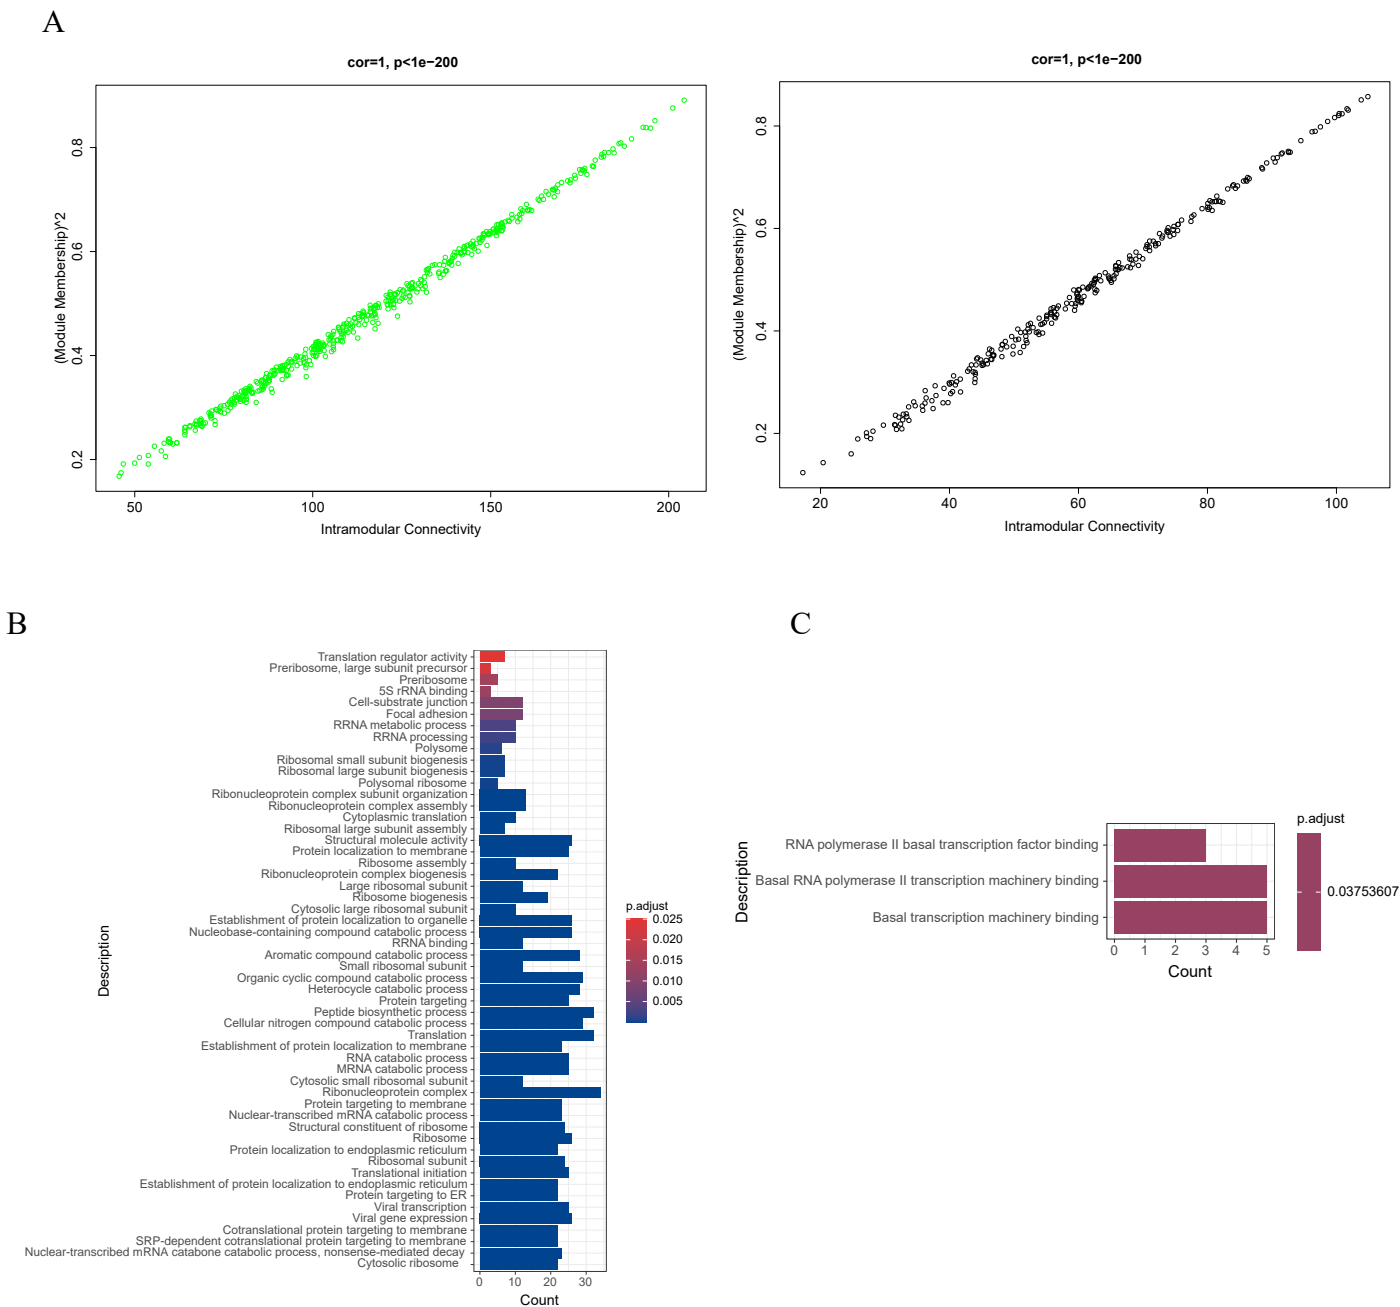

**Figure S2. (A)** Intramodular connectivity measures connectivity or co-expression of given genes in the MEgreen and the MEblack modules. **(B)** GO enrichment analysis of the genes negatively correlation with CSA of H, D and HD. **(C)** GO enrichment analysis of the genes positively correlation with CSA of H, D and HD.
