# Supplementary figures and images for: Dynamic Changes in the Global Transcriptome of Postnatal Skeletal Muscle in Different Sheep
Source: MDPI journal article supplement (doi:10.3390/genes14061298), 2023-06-20

**Figure. S1**

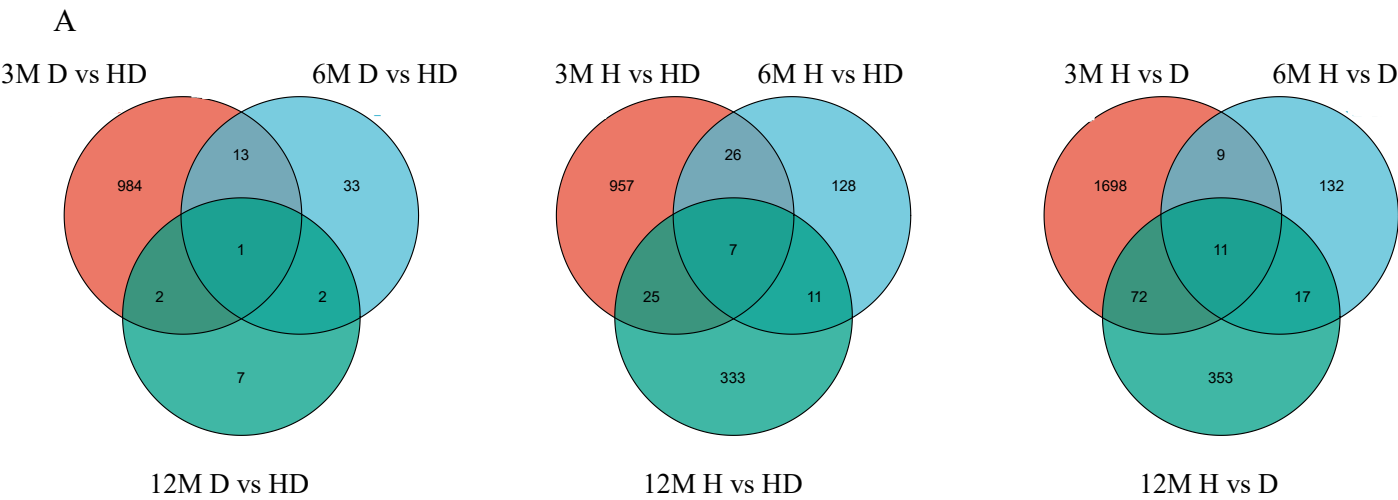

**Figure S1.** Venn diagram showed stage-specific DEGs for any pair of three breeds.

Supplement: s1 [file s1]
